# Supplementary material
Source: PubMed Central journal article supplement (PMC10294016)
Supplement: jamapediatr-e231979-s004.pdf [file jamapediatr-e231979-s004.pdf]

## Data Sharing Statement

Zaoutis. Short-Course Therapy for Urinary Tract Infections in Children. *JAMA Pediatr.*  
Published June 26, 2023. doi:10.1001/jamapediatrics.2023.1979

### Data

**Data available:** Yes

**Data types:** Other (please specify)

**Additional Information:** Summary data will be uploaded to clinical trials.gov

**How to access data:** clinical trials.gov

**When available:** beginning date: 07-13-2020

### Supporting Documents

**Document types:** None

### Additional Information

**Who can access the data:** N/A

**Types of analyses:** N/A

**Mechanisms of data availability:** N/A
